# Supplementary material for: Charge-compensated Zn metallocenes with σ-/π-chelating carboranyl ligands for the formation of constrained geometry Ru(ii) and Ni(ii) complexes
Source: Royal Society of Chemistry journal article supplement (doi:10.1039/c0cc03787g), 2010-11-09
Supplement: c0cc03787g.pdf [file c0cc03787g.pdf]

## Supplementary Information

Charge-compensated Zn metallocenes with  $\sigma$ -/ $\pi$ -chelating carboranyl ligands for the  
formation of constrained geometry Ru(II) and Ni(II) complexes

Jong-Dae Lee, Won-Sik Han, Tae-Jin Kim, Sang Hern Kim, and Sang Ook Kang

**General Procedures** All manipulations were performed under a dry, oxygen-free nitrogen or argon atmosphere using standard Schlenk techniques or in a Vacuum Atmosphere HE-493 drybox. Toluene, hexane, and pentane were distilled under nitrogen from sodium/benzophenone. Dichloromethane was dried with CaH<sub>2</sub>. Pyridine-*d*<sub>5</sub> was distilled under nitrogen from sodium and stored in a Schlenk storage flask until needed. CDCl<sub>3</sub> was predried under CaH<sub>2</sub> and vacuum-transferred. Et<sub>2</sub>Zn were used as received from Strem Chemical. *o*-Carborane was purchased from KatChem and used after sublimation. The dicarbollylamine ligands **1–4** were synthesized according to literature procedure.<sup>1</sup> All <sup>1</sup>H (300.1 MHz), <sup>11</sup>B (96.3 MHz) and <sup>13</sup>C (75.4 MHz) NMR spectra were recorded on a Varian Mercury-300BB spectrometer unless otherwise stated. <sup>1</sup>H and <sup>13</sup>C NMR chemical shifts were measured relative to internal residual peaks from the lock solvent (99.5% (CD<sub>3</sub>)<sub>2</sub>SO, 99.9% CDCl<sub>3</sub>, 99.5% NC<sub>5</sub>D<sub>5</sub>) and then referenced to Me<sub>4</sub>Si (0.00 ppm). All <sup>11</sup>B NMR chemical shifts were referenced to BF<sub>3</sub>·O(C<sub>2</sub>H<sub>5</sub>)<sub>2</sub> (0.0 ppm) with a negative sign indicating an upfield shift. Elemental analyses were performed using a Carlo Erba Instruments CHNS-O EA1108 analyzer. All melting points were uncorrected.

1. (a) Kim D. -H.; Won, J. H.; Kim, S. -J.; Ko, J.; Kim, S. -H.; Cho, S.; Kang, S. O. *Organometallics* **2001**, *20*, 4298. (b) Lee, Y. -J.; Lee, J. -D.; Jeong, H. -J.; Son, K. -C.; Ko, J.; Cheong, M.; Kang, S. O. *Organometallics* **2005**, *24*, 3008. (c) Lee, J. -D.; Lee, Y. -J.; Son, K. -C.; Cheong, M.; Ko, J.; Kang, S. O. *Organometallics* **2007**, *26*, 3374.

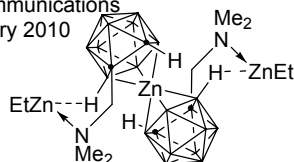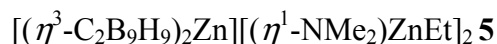

10 mL of a toluene solution of  $\text{ZnEt}_2$  (0.72 g, 6.0 mmol) was added to a stirred solution of 20 mL of toluene containing compound **1** (0.38 g, 2.0 mmol) by cannula at  $-78\text{ }^\circ\text{C}$ . Subsequently, the dry-ice/acetone bath was removed, and the solution was heated under reflux in  $\text{N}_2$  for 12 h. The volatiles were removed under vacuum. Compound **5** was purified by recrystallization from toluene in 87% yield (0.62 g, 0.87 mmol). Mp:  $178\text{ }^\circ\text{C}$  (dec.). HRMS: calcd for  $[\text{}^{12}\text{C}_{12}\text{}^{11}\text{B}_{18}\text{}^1\text{H}_{40}\text{}^{14}\text{N}_2\text{}^{65}\text{Zn}_3]^+$  711.4083. Found: 711.4114. IR spectrum (KBr pellet,  $\text{cm}^{-1}$ )  $\nu(\text{B-H})$  2540,  $\nu(\text{C-H})$  2876, 2910.  $^1\text{H}$  NMR (300.1 MHz, Pyridine- $d_5$ )  $\delta$  0.80 (q, 2H,  $^3J_{\text{HH}} = 7.5\text{ Hz}$ , Zn- $\text{CH}_2\text{CH}_3$ ), 0.97 (q, 2H,  $^3J_{\text{HH}} = 7.5\text{ Hz}$ , Zn- $\text{CH}_2\text{CH}_3$ ), 1.53 (t, 3H,  $^3J_{\text{HH}} = 8.1\text{ Hz}$ , Zn- $\text{CH}_2\text{CH}_3$ ), 1.84 (t, 3H,  $^3J_{\text{HH}} = 8.1\text{ Hz}$ , Zn- $\text{CH}_2\text{CH}_3$ ), 2.14 (s, 6H,  $\text{NMe}_2$ ), 2.17 (d, 1H,  $^2J_{\text{HH}} = 13.2\text{ Hz}$ ,  $\text{CH}_2\text{N}$ ), 2.28 (d, 1H,  $^2J_{\text{HH}} = 13.2\text{ Hz}$ ,  $\text{CH}_2\text{N}$ ), 2.35 (s, 1H,  $\text{C}_{\text{cab}}\text{-H}$ ), 2.45 (s, 6H,  $\text{NMe}_2$ ), 2.53 (d, 1H,  $^2J_{\text{HH}} = 13.2\text{ Hz}$ ,  $\text{CH}_2\text{N}$ ), 2.78 (d, 1H,  $^2J_{\text{HH}} = 13.2\text{ Hz}$ ,  $\text{CH}_2\text{N}$ ).  $^{13}\text{C}$  NMR (75.4 MHz, Pyridine- $d_5$ )  $\delta$   $-3.83$  ( $\text{ZnEt}$ ), 2.79 ( $\text{ZnEt}$ ), 12.98 ( $\text{ZnEt}$ ), 13.15 ( $\text{ZnEt}$ ), 47.15 ( $\text{NMe}_2$ ), 47.62 ( $\text{NMe}_2$ ), 66.81 ( $\text{CH}_2\text{N}$ ), 67.72 ( $\text{CH}_2\text{N}$ ).  $^{11}\text{B}$  NMR (96.3 MHz, Pyridine- $d_5$ )  $\delta$   $-21.07$  (1B),  $-22.96$  (2B),  $-26.43$  (1B),  $-27.45$  (1B),  $-28.73$  (1B),  $-38.84$  (1B),  $-42.71$  (1B),  $-44.68$  (1B).

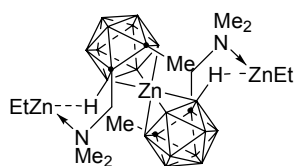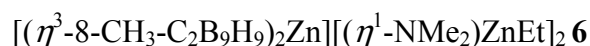

A procedure analogous to the preparation of **5** was used, but starting from **2** (0.21 g, 1.0 mmol) in toluene. Yield: 29% (0.21 g, 0.29 mmol). Mp:  $192\text{ }^\circ\text{C}$  (dec.). HRMS: calcd for  $[\text{}^{12}\text{C}_{14}\text{}^{11}\text{B}_{18}\text{}^1\text{H}_{44}\text{}^{14}\text{N}_2\text{}^{65}\text{Zn}_3]^+$  724.3836. Found: 724.3856. IR spectrum (KBr pellet,  $\text{cm}^{-1}$ )  $\nu(\text{B-H})$  2535,  $\nu(\text{C-H})$  2885, 2950.  $^1\text{H}$  NMR (300.1 MHz, Pyridine- $d_5$ )  $\delta$  0.72 (br, 2H, Zn- $\text{CH}_2\text{CH}_3$ ), 1.21 (br, 2H, Zn- $\text{CH}_2\text{CH}_3$ ), 1.44 (t, 3H,  $^3J_{\text{HH}} = 7.5\text{ Hz}$ , Zn- $\text{CH}_2\text{CH}_3$ ), 1.62 (t, 3H,  $^3J_{\text{HH}} = 7.5\text{ Hz}$ , Zn- $\text{CH}_2\text{CH}_3$ ),

1.96 (s, 3H, C<sub>cab</sub>-Me), 2.09 (s, 6H, NMe<sub>2</sub>), 2.10 (d, 1H, <sup>2</sup>J<sub>HH</sub> = 13.2 Hz, CH<sub>2</sub>N), 2.17 (d, 1H, <sup>2</sup>J<sub>HH</sub> = 13.2 Hz, CH<sub>2</sub>N), 2.39 (s, 6H, NMe<sub>2</sub>), 2.52 (d, 1H, <sup>2</sup>J<sub>HH</sub> = 13.2 Hz, CH<sub>2</sub>N), 2.89 (d, 1H, <sup>2</sup>J<sub>HH</sub> = 13.2 Hz, CH<sub>2</sub>N). <sup>13</sup>C NMR (75.4 MHz, Pyridine-*d*<sub>5</sub>) δ -2.72 (ZnEt), -0.19 (ZnEt), 14.10 (ZnEt), 14.97 (ZnEt), 24.76 (C<sub>cab</sub>-Me), 46.94 (NMe<sub>2</sub>), 47.55 (NMe<sub>2</sub>), 66.20 (CH<sub>2</sub>N), 66.93 (CH<sub>2</sub>N). <sup>11</sup>B NMR (96.3 MHz, Pyridine-*d*<sub>5</sub>) δ -4.25 (1B), -8.74 (1B), -14.76 (2B), -19.10 (1B), -22.26 (1B), -24.59 (1B), -39.61 (1B), -42.21 (1B).

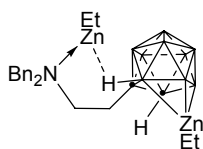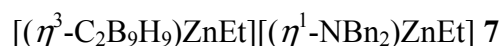

A procedure analogous to the preparation of **5** was used, but starting from **3** (0.36 g, 1.0 mmol) in THF. Yield: 34% (0.19 g, 0.34 mmol). Mp: 157 °C (dec.). HRMS: calcd for [<sup>12</sup>C<sub>24</sub><sup>11</sup>B<sub>9</sub><sup>1</sup>H<sub>38</sub><sup>14</sup>N<sup>65</sup>Zn<sub>2</sub>]<sup>+</sup> 557.2581 Found: 557.2552. IR spectrum (KBr pellet, cm<sup>-1</sup>) ν(B-H) 2514, ν(C-H) 2877, 2955. <sup>1</sup>H NMR (300.1 MHz, Pyridine-*d*<sub>5</sub>) δ 0.74 (br, 2H, Zn-CH<sub>2</sub>CH<sub>3</sub>), 0.91 (br, 2H, Zn-CH<sub>2</sub>CH<sub>3</sub>), 1.33 (br, 3H, Zn-CH<sub>2</sub>CH<sub>3</sub>), 1.54 (br, 3H, Zn-CH<sub>2</sub>CH<sub>3</sub>), 2.40 (s, 1H, C<sub>cab</sub>-H), 2.65 (m, 1H, CH<sub>2</sub>CH<sub>2</sub>N), 2.74 (m, 1H, CH<sub>2</sub>CH<sub>2</sub>N), 3.05 (m, 1H, CH<sub>2</sub>CH<sub>2</sub>N), 3.17 (m, 1H, CH<sub>2</sub>CH<sub>2</sub>N), 3.30 (d, 1H, <sup>2</sup>J<sub>HH</sub> = 13.5 Hz, PhCH<sub>2</sub>N), 3.47 (d, 1H, <sup>2</sup>J<sub>HH</sub> = 13.5 Hz, PhCH<sub>2</sub>N), 3.60 (d, 1H, <sup>2</sup>J<sub>HH</sub> = 4.2 Hz, PhCH<sub>2</sub>N), 3.69 (d, 1H, <sup>2</sup>J<sub>HH</sub> = 4.2 Hz, PhCH<sub>2</sub>N), 7.29–7.65 (m, 10H, PhCH<sub>2</sub>N). <sup>13</sup>C NMR (75.4 MHz, Pyridine-*d*<sub>5</sub>) δ -2.99 (ZnEt), -2.51 (ZnEt), 13.56 (ZnEt), 14.25 (ZnEt), 33.97 (CH<sub>2</sub>CH<sub>2</sub>N), 52.01 (CH<sub>2</sub>CH<sub>2</sub>N), 58.18 (PhCH<sub>2</sub>N), 126.92–129.22 (PhCH<sub>2</sub>N). <sup>11</sup>B NMR (96.3 MHz, Pyridine-*d*<sub>5</sub>) δ -8.19 (1B), -9.78 (1B), -15.01 (2B), -16.56 (2B), -18.27 (2B), -44.04 (1B).

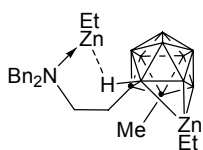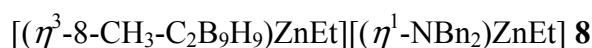

A procedure analogous to the preparation of **5** was used, but starting from **4** (0.37 g, 1.0 mmol) in

THF. Yield: 5.3% (0.3 mg, 0.53  $\mu\text{mol}$ ). mp 1059 °C (dec.). HRMS: calcd for  $[\text{C}_{24}\text{B}_9\text{H}_{40}\text{N}^{65}\text{Zn}_2]^+$  571.2738. Found: 571.2760. IR spectrum (KBr pellet,  $\text{cm}^{-1}$ )  $\nu(\text{B-H})$  2484, 2541,  $\nu(\text{C-H})$  2887, 2964.  $^1\text{H}$  NMR (300.1 MHz, Pyridine- $d_5$ )  $\delta$  0.77 (br, 2H, Zn- $\text{CH}_2\text{CH}_3$ ), 0.93 (br, 2H, Zn- $\text{CH}_2\text{CH}_3$ ), 1.55 (t, 3H,  $^2J_{\text{HH}} = 8.4$  Hz, Zn- $\text{CH}_2\text{CH}_3$ ), 1.69 (t, 3H,  $^2J_{\text{HH}} = 8.4$  Hz, Zn- $\text{CH}_2\text{CH}_3$ ), 1.98 (s, 3H, C<sub>cab</sub>-Me), 2.55 (m, 1H,  $\text{CH}_2\text{CH}_2\text{N}$ ), 2.76 (m, 1H,  $\text{CH}_2\text{CH}_2\text{N}$ ), 2.93 (m, 1H,  $\text{CH}_2\text{CH}_2\text{N}$ ), 3.06 (m, 1H,  $\text{CH}_2\text{CH}_2\text{N}$ ), 3.25 (d, 1H,  $^2J_{\text{HH}} = 13.8$  Hz, Ph $\text{CH}_2\text{N}$ ), 3.44 (d, 1H,  $^2J_{\text{HH}} = 13.8$  Hz, Ph $\text{CH}_2\text{N}$ ), 3.50 (d, 1H,  $^2J_{\text{HH}} = 13.8$  Hz, Ph $\text{CH}_2\text{N}$ ), 3.61 (d, 1H,  $^2J_{\text{HH}} = 13.8$  Hz, Ph $\text{CH}_2\text{N}$ ), 7.10–7.43 (m, 10H, Ph $\text{CH}_2\text{N}$ ).  $^{13}\text{C}$  NMR (75.4 MHz, Pyridine- $d_5$ )  $\delta$  -2.57 (ZnEt), -2.02 (ZnEt), 12.53 (ZnEt), 14.00 (ZnEt), 32.89 ( $\text{CH}_2\text{CH}_2\text{N}$ ), 40.58 ( $\text{CH}_2\text{CH}_2\text{N}$ ), 58.44 (Ph $\text{CH}_2\text{N}$ ), 126.86–128.97 (Ph $\text{CH}_2\text{N}$ ).  $^{11}\text{B}$  NMR (96.3 MHz, Pyridine- $d_5$ )  $\delta$  -9.20 (1B), -12.01 (1B), -15.88 (1B), -16.79 (1B), -23.87 (2B), -32.47 (1B), -43.52 (2B).



N 2774, doi:10.1039/C8CC01680G | © 2018 The Royal Society of Chemistry

774 MP (IR (KBr pellet,  $\text{cm}^{-1}$ )  $\nu(\text{C-H})$  3057, 2929,  $\nu(\text{B-H})$  2536,  $\nu(\text{C=C})$  1436,  $\nu(\text{C-P})$  1095.  $^1\text{H}$  NMR (300.1 MHz,  $\text{CDCl}_3$ )  $\delta$  1.80 (s, 3H,  $\text{NMe}_2$ ), 1.99 (s, 3H,  $\text{NMe}_2$ ), 3.03 (d, 1H,  $\text{NCH}_2$ ,  $^2J_{\text{HH}} = 14$  Hz), 3.20 (d, 1H,  $\text{NCH}_2$ ,  $^2J_{\text{HH}} = 14$  Hz), 3.75 (br, 1H,  $\text{Ccab-H}$ ), 7.62–7.91 (m, 15H,  $\text{PPh}_3$ ).  $^{13}\text{C}$  NMR (75.4 MHz,  $\text{CDCl}_3$ )  $\delta$  42.44 ( $\text{NMe}_2$ ), 60.56 ( $\text{NCH}_2$ ), 128.83, 130.88, 134.59 ( $\text{PPh}_3$ ).  $^{11}\text{B}$  NMR (96.3 MHz,  $\text{CDCl}_3$ )  $\delta$  -3.31 (1B), -10.20 (3B), -16.21 (1B), -20.13 (3B), -24.76 (1B).

|                                      |                                                                   |
|--------------------------------------|-------------------------------------------------------------------|
| Identification code                  | kor591a                                                           |
| Empirical formula                    | $C_{20}H_{52}B_{18}N_2Zn_3$                                       |
| Formula weight                       | 711.33                                                            |
| Temperature                          | 233(2) K                                                          |
| Wavelength                           | 0.71073 Å                                                         |
| Crystal system, space group          | Orthorhombic, $Pbcn$                                              |
| Unit cell dimensions                 | $a = 14.811(5)$ Å<br>$b = 19.090(7)$ Å<br>$c = 13.027(4)$ Å       |
| Volume                               | $3683(2)$ Å <sup>3</sup>                                          |
| Z, D <sub>calc</sub>                 | 4, 1.283 g/mm <sup>3</sup>                                        |
| $\mu$                                | 1.955 mm <sup>-1</sup>                                            |
| $F(000)$                             | 1464                                                              |
| Crystal size                         | 0.46 × 0.17 × 0.14 mm                                             |
| $\theta$ range for data collection   | 2.13 to 28.33 °                                                   |
| Limiting indices                     | $-19 \leq h \leq 9$ , $-25 \leq k \leq 25$ , $-16 \leq l \leq 17$ |
| Reflections collected / unique       | 25547 / 4578 [R(int) = 0.1176]                                    |
| Completeness to $\theta = 25.96$     | 0.7715 and 0.4667                                                 |
| Refinement method                    | Full-matrix least-squares on $F^2$                                |
| Data / restraints / parameters       | 4578 / 0 / 204                                                    |
| Goodness-of-fit on $F^2$             | 1.018                                                             |
| Final R indices [ $I > 2\sigma(I)$ ] | $R_1 = 0.0663$ , $wR_2 = 0.1708$                                  |
| R indices (all data)                 | $R_1 = 0.1591$ , $wR_2 = 0.2504$                                  |
| Absolute structure parameter         | 0.0037(8)                                                         |
| Largest diff. peak and hole          | 1.387 and $-0.645$ e.Å <sup>-3</sup>                              |

<sup>a</sup> $R_1 = \sum ||F_o| - |F_c||$  (based on reflections with  $F_o^2 > 2\sigma F^2$ ), <sup>b</sup> $wR_2 = [\sum [w(F_o^2 - F_c^2)^2] / \sum [w(F_o^2)^2]]^{1/2}$ ;  $w = 1 / [\sigma^2(F_o^2) + (0.095P)^2]$ ;  $P = [\max(F_o^2, 0) + 2F_c^2] / 3$  (also with  $F_o^2 > 2\sigma F^2$ )



---

|               |          |               |           |
|---------------|----------|---------------|-----------|
| Zn(1)-B(10)   | 2.108(7) | B(3)-C(8)     | 1.692(9)  |
| Zn(1)-B(10)#1 | 2.108(7) | B(3)-B(4)     | 1.762(1)  |
| Zn(1)-B(9)    | 2.283(7) | B(3)-B(9)     | 1.773(1)  |
| Zn(1)-B(9)#1  | 2.283(7) | B(4)-B(10)    | 1.749(1)  |
| Zn(1)-B(11)#1 | 2.392(8) | B(4)-B(9)     | 1.763(1)  |
| Zn(1)-B(11)   | 2.392(8) | B(4)-B(5)     | 1.786(1)  |
| Zn(2)-C(15)   | 1.944(8) | B(5)-B(6)     | 1.763(1)  |
| Zn(2)-N       | 2.065(6) | B(5)-B(10)    | 1.770(1)  |
| Zn(2)-B(11)   | 2.511(7) | B(5)-B(11)    | 1.785(1)  |
| Zn(2)-B(6)    | 2.517(7) | B(6)-C(7)     | 1.726(9)  |
| Zn(2)-H(11)   | 1.92(5)  | B(6)-B(11)    | 1.786(1)  |
| N-C(14)       | 1.479(8) | C(7)-C(12)    | 1.525(8)  |
| N-C(13)       | 1.487(8) | C(7)-C(8)     | 1.552(8)  |
| N-C(12)       | 1.500(8) | C(7)-B(11)    | 1.620(9)  |
| B(1)-B(6)     | 1.768(1) | C(8)-B(9)     | 1.662(1)  |
| B(1)-B(2)     | 1.779(1) | B(9)-B(10)    | 1.804(1)  |
| B(1)-B(3)     | 1.782(1) | B(10)-B(11)   | 1.793(1)  |
| B(1)-B(5)     | 1.788(1) | B(11)-H(11)   | 1.11(5)   |
| B(1)-B(4)     | 1.796(1) | C(15)-C(16)   | 1.494(1)  |
| B(2)-C(8)     | 1.708(1) | C(50)-C(51)   | 1.345(16) |
| B(2)-C(7)     | 1.734(9) | C(50)-C(50)#2 | 1.47(2)   |
| B(2)-B(6)     | 1.756(1) | C(51)-C(52)   | 1.335(2)  |
| B(2)-B(3)     | 1.769(1) | C(52)-C(52)#2 | 1.34(2)   |

---

|                       |          |                  |          |
|-----------------------|----------|------------------|----------|
| B(10)-Zn(1)-B(10)#1   | 180.0(1) | B(11)-B(5)-B(1)  | 107.3(5) |
| B(10)-Zn(1)-B(9)      | 48.3(3)  | B(4)-B(5)-B(1)   | 60.3(4)  |
| B(10)#1-Zn(1)-B(9)    | 131.7(3) | C(7)-B(6)-B(2)   | 59.7(4)  |
| B(10)-Zn(1)-B(9)#1    | 131.7(3) | C(7)-B(6)-B(5)   | 102.4(5) |
| B(10)#1-Zn(1)-B(9)#1  | 48.3(3)  | B(2)-B(6)-B(5)   | 109.1(5) |
| B(9)-Zn(1)-B(9)#1     | 180.0(1) | C(7)-B(6)-B(1)   | 104.7(5) |
| B(10)-Zn(1)-B(11)#1   | 133.6(3) | B(2)-B(6)-B(1)   | 60.6(4)  |
| B(10)#1-Zn(1)-B(11)#1 | 46.4(3)  | B(5)-B(6)-B(1)   | 60.8(4)  |
| B(9)-Zn(1)-B(11)#1    | 106.5(3) | C(7)-B(6)-B(11)  | 54.9(4)  |
| B(9)#1-Zn(1)-B(11)#1  | 73.5(3)  | B(2)-B(6)-B(11)  | 106.5(5) |
| B(10)-Zn(1)-B(11)     | 46.4(3)  | B(5)-B(6)-B(11)  | 60.4(4)  |
| B(10)#1-Zn(1)-B(11)   | 133.6(3) | B(1)-B(6)-B(11)  | 108.2(5) |
| B(9)-Zn(1)-B(11)      | 73.5(3)  | C(7)-B(6)-Zn(2)  | 86.4(3)  |
| B(9)#1-Zn(1)-B(11)    | 106.5(3) | B(2)-B(6)-Zn(2)  | 134.9(4) |
| B(11)#1-Zn(1)-B(11)   | 180.0(3) | B(5)-B(6)-Zn(2)  | 106.5(4) |
| C(15)-Zn(2)-N         | 132.1(3) | B(1)-B(6)-Zn(2)  | 164.4(5) |
| C(15)-Zn(2)-B(11)     | 141.0(3) | B(11)-B(6)-Zn(2) | 69.0(3)  |
| N-Zn(2)-B(11)         | 85.2(2)  | C(12)-C(7)-C(8)  | 116.4(5) |
| C(15)-Zn(2)-B(6)      | 135.1(3) | C(12)-C(7)-B(11) | 120.2(5) |
| N-Zn(2)-B(6)          | 84.6(2)  | C(8)-C(7)-B(11)  | 112.4(5) |
| B(11)-Zn(2)-B(6)      | 41.6(2)  | C(12)-C(7)-B(6)  | 122.1(5) |
| C(15)-Zn(2)-H(11)     | 125.3(1) | C(8)-C(7)-B(6)   | 110.9(5) |
| N-Zn(2)-H(11)         | 91.6(1)  | B(11)-C(7)-B(6)  | 64.4(4)  |
| B(11)-Zn(2)-H(11)     | 24.6(1)  | C(12)-C(7)-B(2)  | 116.4(5) |
| B(6)-Zn(2)-H(11)      | 65.9(1)  | C(8)-C(7)-B(2)   | 62.3(4)  |
| C(14)-N-C(13)         | 107.7(6) | B(11)-C(7)-B(2)  | 115.6(5) |
| C(14)-N-C(12)         | 110.4(5) | B(6)-C(7)-B(2)   | 61.0(4)  |

|                |          |                   |          |
|----------------|----------|-------------------|----------|
| C(14)-N-Zn(2)  | 109.2(5) | C(7)-C(8)-B(9)    | 112.3(5) |
| C(13)-N-Zn(2)  | 106.9(4) | C(7)-C(8)-B(3)    | 113.5(5) |
| C(12)-N-Zn(2)  | 108.8(5) | B(9)-C(8)-B(3)    | 63.8(4)  |
| B(6)-B(1)-B(2) | 113.6(4) | C(7)-C(8)-B(2)    | 64.1(4)  |
| B(6)-B(1)-B(3) | 59.4(4)  | B(9)-C(8)-B(2)    | 116.7(5) |
| B(2)-B(1)-B(3) | 106.5(5) | B(3)-C(8)-B(2)    | 62.7(4)  |
| B(6)-B(1)-B(5) | 59.6(4)  | C(8)-B(9)-B(4)    | 104.0(5) |
| B(2)-B(1)-B(5) | 59.4(4)  | C(8)-B(9)-B(3)    | 58.9(4)  |
| B(3)-B(1)-B(5) | 106.9(5) | B(4)-B(9)-B(3)    | 59.8(4)  |
| B(6)-B(1)-B(4) | 106.8(5) | C(8)-B(9)-B(10)   | 105.5(5) |
| B(2)-B(1)-B(4) | 106.6(5) | B(4)-B(9)-B(10)   | 58.7(4)  |
| B(3)-B(1)-B(4) | 106.6(6) | B(3)-B(9)-B(10)   | 107.9(5) |
| B(5)-B(1)-B(4) | 59.0(4)  | C(8)-B(9)-Zn(1)   | 84.4(4)  |
| C(8)-B(2)-C(7) | 59.8(4)  | B(4)-B(9)-Zn(1)   | 118.9(5) |
| C(8)-B(2)-B(6) | 53.6(4)  | B(3)-B(9)-Zn(1)   | 138.4(5) |
| C(7)-B(2)-B(6) | 102.5(5) | B(10)-B(9)-Zn(1)  | 60.8(3)  |
| C(8)-B(2)-B(3) | 59.3(4)  | B(4)-B(10)-B(5)   | 61.0(4)  |
| C(7)-B(2)-B(3) | 58.2(4)  | B(4)-B(10)-B(11)  | 106.4(5) |
| B(6)-B(2)-B(3) | 101.5(5) | B(5)-B(10)-B(11)  | 60.1(4)  |
| C(8)-B(2)-B(1) | 107.5(5) | B(4)-B(10)-B(9)   | 59.5(4)  |
| C(7)-B(2)-B(1) | 103.7(5) | B(5)-B(10)-B(9)   | 106.9(5) |
| B(6)-B(2)-B(1) | 103.9(5) | B(11)-B(10)-B(9)  | 102.2(5) |
| B(3)-B(2)-B(1) | 60.0(4)  | B(4)-B(10)-Zn(1)  | 129.7(5) |
| C(8)-B(3)-B(4) | 60.3(4)  | B(5)-B(10)-Zn(1)  | 134.0(5) |
| C(8)-B(3)-B(2) | 102.7(5) | B(11)-B(10)-Zn(1) | 75.2(3)  |
| B(4)-B(3)-B(2) | 59.1(4)  | B(9)-B(10)-Zn(1)  | 70.9(3)  |
| C(8)-B(3)-B(9) | 108.5(5) | C(7)-B(11)-B(5)   | 105.9(5) |
|                | 57.2(4)  | C(7)-B(11)-B(6)   | 60.7(4)  |

|                  |          |                     |          |
|------------------|----------|---------------------|----------|
| B(4)-B(3)-B(9)   | 59.2(5)  | B(5)-B(11)-B(6)     | 59.2(4)  |
| B(2)-B(3)-B(9)   | 108.2(5) | C(7)-B(11)-B(10)    | 107.4(5) |
| C(8)-B(3)-B(1)   | 104.3(5) | B(5)-B(11)-B(10)    | 59.3(4)  |
| B(4)-B(3)-B(1)   | 60.9(5)  | B(6)-B(11)-B(10)    | 108.3(5) |
| B(2)-B(3)-B(1)   | 60.1(4)  | C(7)-B(11)-Zn(1)    | 83.2(4)  |
| B(9)-B(3)-B(1)   | 108.9(5) | B(5)-B(11)-Zn(1)    | 116.8(4) |
| B(10)-B(4)-B(9)  | 61.8(4)  | B(6)-B(11)-Zn(1)    | 136.9(4) |
| B(10)-B(4)-B(3)  | 110.9(5) | B(10)-B(11)-Zn(1)   | 58.4(3)  |
| B(9)-B(4)-B(3)   | 60.4(4)  | C(7)-B(11)-Zn(2)    | 88.9(4)  |
| B(10)-B(4)-B(5)  | 60.1(4)  | B(5)-B(11)-Zn(2)    | 106.0(4) |
| B(9)-B(4)-B(5)   | 108.0(5) | B(6)-B(11)-Zn(2)    | 69.4(3)  |
| B(3)-B(4)-B(5)   | 107.7(5) | B(10)-B(11)-Zn(2)   | 160.2(5) |
| B(10)-B(4)-B(1)  | 110.0(5) | Zn(1)-B(11)-Zn(2)   | 137.0(3) |
| B(9)-B(4)-B(1)   | 108.7(5) | C(7)-B(11)-H(11)    | 119(2)   |
| B(3)-B(4)-B(1)   | 60.1(4)  | B(5)-B(11)-H(11)    | 123(3)   |
| B(5)-B(4)-B(1)   | 59.9(4)  | B(6)-B(11)-H(11)    | 115(3)   |
| B(6)-B(5)-B(10)  | 110.4(5) | B(10)-B(11)-H(11)   | 128(3)   |
| B(6)-B(5)-B(11)  | 60.4(4)  | Zn(1)-B(11)-H(11)   | 102(3)   |
| B(10)-B(5)-B(11) | 60.6(4)  | Zn(2)-B(11)-H(11)   | 46(3)    |
| B(6)-B(5)-B(4)   | 107.2(5) | N-C(12)-C(7)        | 112.3(5) |
| B(10)-B(5)-B(4)  | 58.9(4)  | C(16)-C(15)-Zn(2)   | 117.3(6) |
| B(11)-B(5)-B(4)  | 105.2(5) | C(51)-C(50)-C(50)#2 | 117.6(7) |
| B(6)-B(5)-B(1)   | 59.7(4)  | C(52)-C(51)-C(50)   | 121.2(1) |
| B(10)-B(5)-B(1)  | 109.4(5) | C(51)-C(52)-C(52)#2 | 121.1(7) |

Symmetry transformations used to generate equivalent atoms:

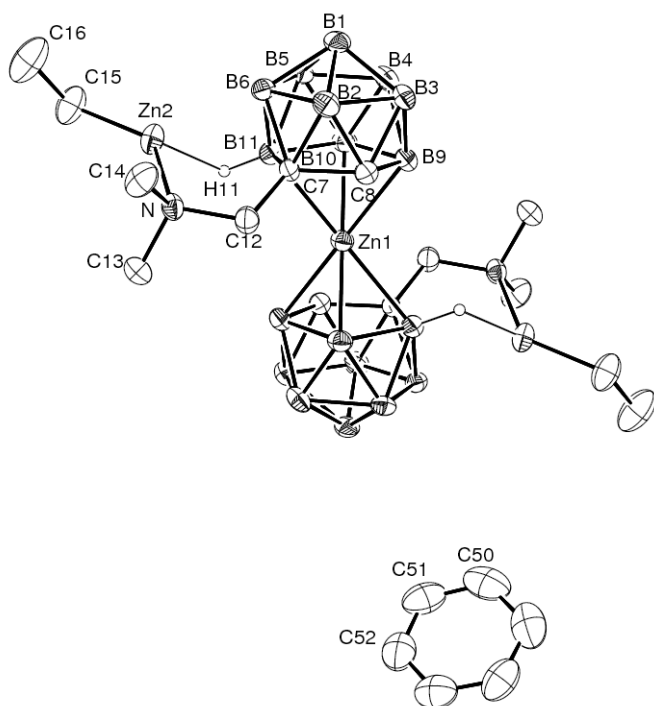

**Figure 1.** Molecular structure of  $5 \cdot C_6H_6$  with thermal ellipsoids drawn at the 30% level. Hydrogen atoms are omitted for clarity, except for H11 atom.

|                                                       |                                                                                                                                                 |
|-------------------------------------------------------|-------------------------------------------------------------------------------------------------------------------------------------------------|
| Identification code                                   | kor598                                                                                                                                          |
| Empirical formula                                     | C <sub>23</sub> H <sub>40</sub> B <sub>9</sub> NZn <sub>2</sub>                                                                                 |
| Formula weight                                        | 558.59                                                                                                                                          |
| Temperature                                           | 233(2) K                                                                                                                                        |
| Wavelength                                            | 0.7107 Å                                                                                                                                        |
| Crystal system, space group                           | Triclinic, <i>P</i> $\bar{1}$                                                                                                                   |
| Unit cell dimensions                                  | $a = 9.739(5)$ Å $\alpha = 98.253(10)^\circ$<br>$b = 10.464(5)$ Å $\beta = 101.615(10)^\circ$<br>$c = 16.253(8)$ Å $\gamma = 116.492(11)^\circ$ |
| Volume                                                | 1399.6(12) Å <sup>3</sup>                                                                                                                       |
| Z, D <sub>calc</sub>                                  | 2, 1.325 g/mm <sup>3</sup>                                                                                                                      |
| $\mu$                                                 | 1.727 mm <sup>-1</sup>                                                                                                                          |
| <i>F</i> (000)                                        | 580                                                                                                                                             |
| Crystal size                                          | 0.32 × 0.12 × 0.11 mm                                                                                                                           |
| $\theta$ range for data collection                    | 1.33 to 28.41°                                                                                                                                  |
| Limiting indices                                      | -13 ≤ <i>h</i> ≤ 12, -13 ≤ <i>k</i> ≤ 13, -21 ≤ <i>l</i> ≤ 21                                                                                   |
| Reflections collected / unique                        | 19321 / 6943 [R(int) = 0.2039]                                                                                                                  |
| Completeness to $\theta = 25.96$                      | 0.8327 and 0.6079                                                                                                                               |
| Refinement method                                     | Full-matrix least-squares on <i>F</i> <sup>2</sup>                                                                                              |
| Data / restraints / parameters                        | 6943 / 0 / 328                                                                                                                                  |
| Goodness-of-fit on <i>F</i> <sup>2</sup>              | 0.879                                                                                                                                           |
| Final R indices [ <i>I</i> > 2 $\sigma$ ( <i>I</i> )] | <i>R</i> <sub>1</sub> = 0.0828, <i>wR</i> <sub>2</sub> = 0.1973                                                                                 |
| R indices (all data)                                  | <i>R</i> <sub>1</sub> = 0.3056, <i>wR</i> <sub>2</sub> = 0.3267                                                                                 |
| Absolute structure parameter                          | 0.033(5)                                                                                                                                        |
| Largest diff. peak and hole                           | 0.617 and -0.797 e.Å <sup>-3</sup>                                                                                                              |

<sup>a</sup>*R*<sub>1</sub> =  $\sum||F_o| - |F_c||$  (based on reflections with  $F_o^2 > 2\sigma F^2$ ), <sup>b</sup>*wR*<sub>2</sub> =  $[\sum[w(F_o^2 - F_c^2)^2] / \sum[w(F_o^2)^2]]^{1/2}$ ; *w* =  $1 / [\sigma^2(F_o^2) + (0.095P)^2]$ ; *P* =  $[\max(F_o^2, 0) + 2F_c^2] / 3$  (also with  $F_o^2 > 2\sigma F^2$ )

---

|             |          |             |          |
|-------------|----------|-------------|----------|
| Zn(1)-C(29) | 1.852(2) | B(5)-B(11)  | 1.813(2) |
| Zn(1)-B(10) | 2.158(1) | B(6)-C(7)   | 1.682(2) |
| Zn(1)-B(9)  | 2.268(1) | B(6)-B(11)  | 1.779(2) |
| Zn(1)-B(11) | 2.316(1) | C(7)-C(13)  | 1.542(1) |
| Zn(2)-C(31) | 1.950(1) | C(7)-C(8)   | 1.549(1) |
| Zn(2)-N     | 2.053(7) | C(7)-B(11)  | 1.631(1) |
| Zn(2)-B(6)  | 2.497(2) | C(8)-C(12)  | 1.525(2) |
| Zn(2)-B(11) | 2.530(1) | C(8)-B(9)   | 1.642(1) |
| Zn(2)-H(11) | 1.80(6)  | B(9)-B(10)  | 1.772(4) |
| N-C(14)     | 1.487(9) | B(10)-B(11) | 1.772(2) |
| N-C(22)     | 1.512(1) | B(11)-H(11) | 1.13(6)  |
| N-C(15)     | 1.529(9) | C(13)-C(14) | 1.509(1) |
| B(1)-B(6)   | 1.73(2)  | C(15)-C(16) | 1.497(1) |
| B(1)-B(4)   | 1.74(3)  | C(16)-C(17) | 1.361(1) |
| B(1)-B(5)   | 1.75(2)  | C(16)-C(21) | 1.407(1) |
| B(1)-B(3)   | 1.76(3)  | C(17)-C(18) | 1.408(1) |
| B(1)-B(2)   | 1.77(2)  | C(18)-C(19) | 1.343(2) |
| B(2)-C(8)   | 1.70(2)  | C(19)-C(20) | 1.343(2) |
| B(2)-C(7)   | 1.705(2) | C(20)-C(21) | 1.370(1) |
| B(2)-B(6)   | 1.714(2) | C(22)-C(23) | 1.501(1) |
| B(2)-B(3)   | 1.76(2)  | C(23)-C(24) | 1.360(1) |
| B(3)-B(4)   | 1.68(3)  | C(23)-C(28) | 1.376(1) |
| B(3)-C(8)   | 1.75(3)  | C(24)-C(25) | 1.383(1) |
| B(3)-B(9)   | 1.77(3)  | C(25)-C(26) | 1.314(2) |
| B(4)-B(9)   | 1.75(3)  | C(26)-C(27) | 1.333(2) |
| B(4)-B(10)  | 1.76(2)  | C(27)-C(28) | 1.382(2) |
| B(4)-B(5)   | 1.77(3)  | C(29)-C(30) | 1.51(2)  |

---

B(5)-B(6)

1.783(2)

---



|                   |          |                  |          |
|-------------------|----------|------------------|----------|
| C(29)-Zn(1)-B(10) | 171.7(6) | B(5)-B(6)-Zn(2)  | 94.8(8)  |
| C(29)-Zn(1)-B(9)  | 138.8(7) | C(13)-C(7)-C(8)  | 116.8(8) |
| B(10)-Zn(1)-B(9)  | 47.1(3)  | C(13)-C(7)-B(11) | 122.5(8) |
| C(29)-Zn(1)-B(11) | 94.5(3)  | C(8)-C(7)-B(11)  | 111.7(8) |
| B(10)-Zn(1)-B(11) | 126.4(5) | C(13)-C(7)-B(6)  | 119.1(8) |
| B(9)-Zn(1)-B(11)  | 94.6(3)  | C(8)-C(7)-B(6)   | 111.3(9) |
| C(31)-Zn(2)-N     | 41.4(4)  | B(11)-C(7)-B(6)  | 64.9(7)  |
| C(31)-Zn(2)-B(6)  | 126.1(2) | C(13)-C(7)-B(2)  | 113.0(8) |
| N-Zn(2)-B(6)      | 88.7(2)  | C(8)-C(7)-B(2)   | 62.8(8)  |
| C(31)-Zn(2)-B(11) | 108.1(6) | B(11)-C(7)-B(2)  | 115.5(9) |
| N-Zn(2)-B(11)     | 109.2(6) | B(6)-C(7)-B(2)   | 60.8(8)  |
| B(6)-Zn(2)-B(11)  | 106.0(6) | C(12)-C(8)-C(7)  | 120.5(9) |
| C(31)-Zn(2)-H(11) | 113.8(5) | C(12)-C(8)-B(9)  | 119.1(1) |
| N-Zn(2)-H(11)     | 106.6(1) | C(7)-C(8)-B(9)   | 111.2(8) |
| C(14)-N-C(22)     | 57.4(1)  | C(12)-C(8)-B(2)  | 116.7(1) |
| C(14)-N-C(15)     | 107.6(2) | C(7)-C(8)-B(2)   | 63.1(8)  |
| C(22)-N-C(15)     | 58.7(8)  | B(9)-C(8)-B(2)   | 114.1(1) |
| C(14)-N-Zn(2)     | 105.6(2) | C(12)-C(8)-B(3)  | 118.4(1) |
| C(22)-N-Zn(2)     | 108.4(1) | C(7)-C(8)-B(3)   | 111.4(1) |
| C(15)-N-Zn(2)     | 59.7(1)  | B(9)-C(8)-B(3)   | 63.0(9)  |
| B(6)-B(1)-B(4)    | 121.7    | B(2)-C(8)-B(3)   | 61.3(1)  |
| B(6)-B(1)-B(5)    | 122.8    | C(8)-B(9)-B(4)   | 105.0(1) |
| B(4)-B(1)-B(5)    | 120.3    | C(8)-B(9)-B(10)  | 107.5(6) |
| B(6)-B(1)-B(3)    | 60.7(1)  | B(4)-B(9)-B(10)  | 60.1(8)  |
| B(4)-B(1)-B(3)    | 103.9(1) | C(8)-B(9)-B(3)   | 61.4(8)  |
| B(5)-B(1)-B(3)    | 107.5(1) | B(4)-B(9)-B(3)   | 57.0(1)  |
| B(6)-B(1)-B(2)    | 105.3(1) | B(10)-B(9)-B(3)  | 107.5(9) |

|                 |           |                   |           |
|-----------------|-----------|-------------------|-----------|
| B(4)-B(1)-B(2)  | 104.2(10) | C(8)-B(9)-Zn(1)   | 81.9(7)   |
| B(5)-B(1)-B(2)  | 59.6(9)   | B(4)-B(9)-Zn(1)   | 122.2(9)  |
| B(3)-B(1)-B(2)  | 59.9(10)  | B(10)-B(9)-Zn(1)  | 63.2(3)   |
| C(8)-B(2)-C(7)  | 125.1     | B(3)-B(9)-Zn(1)   | 138.2(7)  |
| C(8)-B(2)-B(6)  | 125.7     | B(5)-B(10)-B(4)   | 61.2(11)  |
| C(7)-B(2)-B(6)  | 122.8     | B(5)-B(10)-B(11)  | 62.5(7)   |
| C(8)-B(2)-B(3)  | 121.6     | B(4)-B(10)-B(11)  | 107.4(11) |
| C(7)-B(2)-B(3)  | 122.7     | B(5)-B(10)-B(9)   | 107.6(7)  |
| B(6)-B(2)-B(3)  | 103.4(13) | B(4)-B(10)-B(9)   | 59.3(8)   |
| C(8)-B(2)-B(1)  | 108.6(15) | B(11)-B(10)-B(9)  | 101.5(5)  |
| C(7)-B(2)-B(1)  | 58.1(8)   | B(5)-B(10)-Zn(1)  | 132.4(7)  |
| B(6)-B(2)-B(1)  | 60.6(13)  | B(4)-B(10)-Zn(1)  | 127.8(9)  |
| B(3)-B(2)-B(1)  | 103.7(11) | B(11)-B(10)-Zn(1) | 71.4(6)   |
| B(4)-B(3)-C(8)  | 60.3(10)  | B(9)-B(10)-Zn(1)  | 69.7(3)   |
| B(4)-B(3)-B(2)  | 60.7(11)  | C(7)-B(11)-B(10)  | 107.6(9)  |
| C(8)-B(3)-B(2)  | 55.6(9)   | C(7)-B(11)-B(6)   | 58.9(7)   |
| B(4)-B(3)-B(1)  | 105.2(11) | B(10)-B(11)-B(6)  | 106.3(9)  |
| C(8)-B(3)-B(1)  | 107.4(13) | C(7)-B(11)-B(5)   | 105.3(10) |
| B(2)-B(3)-B(1)  | 121.6     | B(10)-B(11)-B(5)  | 57.4(8)   |
| B(4)-B(3)-B(9)  | 126.6     | B(6)-B(11)-B(5)   | 59.5(8)   |
| C(8)-B(3)-B(9)  | 121.9     | C(7)-B(11)-Zn(1)  | 82.0(6)   |
| B(2)-B(3)-B(9)  | 122.1     | B(10)-B(11)-Zn(1) | 62.1(6)   |
| B(1)-B(3)-B(9)  | 123.2     | B(6)-B(11)-Zn(1)  | 134.7(8)  |
| B(3)-B(4)-B(1)  | 62.0(12)  | B(5)-B(11)-Zn(1)  | 118.4(9)  |
| B(3)-B(4)-B(9)  | 62.3(12)  | C(7)-B(11)-Zn(2)  | 99.9(6)   |
| B(1)-B(4)-B(9)  | 109.7(11) | B(10)-B(11)-Zn(2) | 143.6(7)  |
| B(3)-B(4)-B(10) | 112.3(12) | B(6)-B(11)-Zn(2)  | 68.3(6)   |
| B(1)-B(4)-B(10) | 108.4(12) | B(5)-B(11)-Zn(2)  | 92.9(8)   |

|                  |          |                   |          |
|------------------|----------|-------------------|----------|
| B(9)-B(4)-B(10)  | 147.2(6) | Zn(1)-B(11)-Zn(2) | 147.2(6) |
| B(3)-B(4)-B(5)   | 110.2(1) | C(7)-B(11)-H(11)  | 114(3)   |
| B(1)-B(4)-B(5)   | 59.8(1)  | B(10)-B(11)-H(11) | 136(3)   |
| B(9)-B(4)-B(5)   | 106.5(1) | B(6)-B(11)-H(11)  | 106(3)   |
| B(10)-B(4)-B(5)  | 58.3(9)  | B(5)-B(11)-H(11)  | 120(3)   |
| B(10)-B(5)-B(1)  | 109.6(1) | Zn(1)-B(11)-H(11) | 110(3)   |
| B(10)-B(5)-B(4)  | 60.5(1)  | Zn(2)-B(11)-H(11) | 39(3)    |
| B(1)-B(5)-B(4)   | 59.0(1)  | C(14)-C(13)-C(7)  | 116.4(7) |
| B(10)-B(5)-B(6)  | 108.4(1) | N-C(14)-C(13)     | 118.1(7) |
| B(1)-B(5)-B(6)   | 58.7(8)  | C(16)-C(15)-N     | 114.8(6) |
| B(4)-B(5)-B(6)   | 104.3(1) | C(17)-C(16)-C(21) | 119.3(9) |
| B(10)-B(5)-B(11) | 60.1(8)  | C(17)-C(16)-C(15) | 122.1(9) |
| B(1)-B(5)-B(11)  | 106.4(1) | C(21)-C(16)-C(15) | 118.6(9) |
| B(4)-B(5)-B(11)  | 105.1(1) | C(16)-C(17)-C(18) | 119.5(1) |
| B(6)-B(5)-B(11)  | 59.3(7)  | C(19)-C(18)-C(17) | 120.6(1) |
| C(7)-B(6)-B(2)   | 60.2(8)  | C(20)-C(19)-C(18) | 119.7(1) |
| C(7)-B(6)-B(1)   | 106.9(1) | C(19)-C(20)-C(21) | 122.4(1) |
| B(2)-B(6)-B(1)   | 61.7(9)  | C(20)-C(21)-C(16) | 118.4(1) |
| C(7)-B(6)-B(11)  | 56.1(6)  | C(23)-C(22)-N     | 114.5(7) |
| B(2)-B(6)-B(11)  | 107.7(1) | C(24)-C(23)-C(28) | 116.9(9) |
| B(1)-B(6)-B(11)  | 108.8(1) | C(24)-C(23)-C(22) | 121.3(8) |
| C(7)-B(6)-B(5)   | 104.5(1) | C(28)-C(23)-C(22) | 121.7(9) |
| B(2)-B(6)-B(5)   | 109.3(1) | C(23)-C(24)-C(25) | 122.0(9) |
| B(1)-B(6)-B(5)   | 59.7(8)  | C(26)-C(25)-C(24) | 120.3(1) |
| B(11)-B(6)-B(5)  | 61.2(8)  | C(25)-C(26)-C(27) | 119.2(1) |
| C(7)-B(6)-Zn(2)  | 99.7(6)  | C(26)-C(27)-C(28) | 122.5(1) |
| B(2)-B(6)-Zn(2)  | 151.4(7) | C(23)-C(28)-C(27) | 119.0(1) |
| B(1)-B(6)-Zn(2)  | 146.8(1) | C(30)-C(29)-Zn(1) | 120.9(1) |

Symmetry transformations used to generate equivalent atoms:
